# Supplementary material for: Bacterial Community Diversity of Oil-Contaminated Soils Assessed by High Throughput Sequencing of 16S rRNA Genes
Source: PubMed Central journal article supplement (PMC4626951; doi:10.3390/ijerph121012002), 2015-09-24
Supplement: ijerph-12-12002-s001.pdf [file ijerph-12-12002-s001.pdf]

## Supplementary Information

**Table S1.** Relative abundances of bacterial phyla in the studied soils. Values represent percentages of all sequences assigned to the bacteria for soils. The description of sample name is shown in Table 1.

| <b>Phylum</b>                         | <b>JBT60</b> | <b>JBT70</b> | <b>SYT</b> | <b>JBT1</b> | <b>JBT2</b> |
|---------------------------------------|--------------|--------------|------------|-------------|-------------|
| <i>Acidobacteria</i>                  | 18.53        | 10.14        | 14.73      | 0.67        | 0.38        |
| <i>Actinobacteria</i>                 | 22.92        | 30.14        | 33.77      | 57.52       | 80.62       |
| <i>Armatimonadetes</i>                | 0.63         | 0.33         | 0.61       | 0.04        | 0           |
| <i>candidate division BD1-5</i>       | 0.02         | 0.03         | 0          | 0           | 0           |
| <i>Bacteroidetes</i>                  | 0.51         | 1.96         | 3.61       | 7.5         | 1.4         |
| <i>candidate division BRC1</i>        | 0.07         | 0.24         | 0.09       | 0.02        | 0.04        |
| <i>candidate division OD1</i>         | 0.2          | 0.02         | 0          | 0.02        | 0           |
| <i>candidate division OP11</i>        | 0.05         | 0            | 0          | 0           | 0           |
| <i>candidate division OP3</i>         | 0.1          | 0            | 0          | 0           | 0           |
| <i>candidate division TM7</i>         | 0.44         | 0.36         | 2.02       | 0.06        | 0           |
| <i>candidate division WS3</i>         | 0.05         | 0            | 0.05       | 0           | 0           |
| <i>Chlorobi</i>                       | 0.12         | 0.05         | 0.28       | 0           | 0           |
| <i>Chloroflexi</i>                    | 6.83         | 7.67         | 8.49       | 1.55        | 3.37        |
| <i>Cyanobacteria</i>                  | 0.24         | 0.1          | 0.47       | 0.02        | 0           |
| <i>Deinococcus</i>                    | 0            | 0            | 0          | 0.17        | 0.37        |
| <i>Elusimicrobia</i>                  | 0.22         | 0            | 0.05       | 0           | 0           |
| <i>Fibrobacteres</i>                  | 0.12         | 0.02         | 0          | 0           | 0           |
| <i>Firmicutes</i>                     | 0.22         | 0.16         | 0.33       | 3.7         | 0.09        |
| <i>Gemmatimonadetes</i>               | 2.61         | 0.8          | 4.64       | 9.6         | 8.02        |
| <i>candidate division JL-ETNP-Z39</i> | 0.02         | 0            | 0          | 0           | 0           |
| <i>candidate division MVP-21</i>      | 0.02         | 0            | 0.38       | 0           | 0           |
| <i>Nitrospirae</i>                    | 1.76         | 0.02         | 0.42       | 0           | 0           |
| <i>Planctomycetes</i>                 | 8.42         | 6.58         | 3.52       | 2.04        | 1.69        |
| <i>Proteobacteria</i>                 | 33.27        | 36.71        | 24.2       | 16.26       | 3.3         |
| <i>candidate division SM2F11</i>      | 0.05         | 0.02         | 0.14       | 0           | 0           |
| <i>candidate division TA06</i>        | 0            | 1.16         | 0.05       | 0.02        | 0           |
| <i>candidate division TM6</i>         | 0.07         | 0.14         | 0          | 0           | 0           |
| <i>Verrucomicrobia</i>                | 0.44         | 1.89         | 0.75       | 0           | 0           |
| <i>candidate division WCHB1-60</i>    | 0            | 0.02         | 0          | 0.19        | 0           |

**Table S2.** Relative abundances of bacterial class in the studied soils. Values represent percentages of all sequences assigned to the bacteria for soils. The description of sample name is shown in Table 1.

| <b>Class</b>                       | <b>JBT60</b> | <b>JBT70</b> | <b>SYT</b> | <b>JBT1</b> | <b>JBT2</b> |
|------------------------------------|--------------|--------------|------------|-------------|-------------|
| <i>Acidimicrobiia</i>              | 12.06        | 8.71         | 6.14       | 2.71        | 3.76        |
| <i>Acidobacteria</i>               | 16.82        | 7.56         | 11.26      | 0.59        | 0.21        |
| <i>Actinobacteria</i>              | 3.44         | 16.31        | 18.34      | 8.68        | 20.61       |
| <i>Alphaproteobacteria</i>         | 16.94        | 15.15        | 13.32      | 6.01        | 2.71        |
| <i>Anaerolineae</i>                | 0.44         | 3.72         | 2.16       | 0.04        | 0           |
| <i>Armatimonadia</i>               | 0            | 0.05         | 0.09       | 0.02        | 0           |
| <i>Bacilli</i>                     | 0.17         | 0.09         | 0.23       | 3.66        | 0.09        |
| <i>Bacteroidia</i>                 | 0            | 0.36         | 0          | 0.06        | 0           |
| <i>Betaproteobacteria</i>          | 2.66         | 4.22         | 3.75       | 0.17        | 0.02        |
| <i>Caldilineae</i>                 | 0.05         | 0.45         | 0.42       | 0.04        | 0           |
| <i>Chlorobia</i>                   | 0.12         | 0.03         | 0.23       | 0           | 0           |
| <i>Chloroflexi</i>                 | 0.15         | 0.14         | 0.47       | 0.02        | 0           |
| <i>Chthonomonadetes</i>            | 0            | 0.09         | 0          | 0           | 0           |
| <i>Clostridia</i>                  | 0.05         | 0.07         | 0.09       | 0.04        | 0           |
| <i>Coriobacteriia</i>              | 0.02         | 0.02         | 0          | 0           | 0           |
| <i>Cyanobacteria(no_rank)</i>      | 0            | 0            | 0.33       | 0.02        | 0           |
| <i>Cytophagia</i>                  | 0.37         | 1.04         | 1.59       | 6.72        | 1.39        |
| <i>Deinococci</i>                  | 0            | 0            | 0          | 0.17        | 0.37        |
| <i>Deltaproteobacteria</i>         | 5.61         | 2.63         | 3.05       | 0.76        | 0.24        |
| <i>Elusimicrobia</i>               | 0.22         | 0            | 0.05       | 0           | 0           |
| <i>Fibrobacteria</i>               | 0.12         | 0.02         | 0          | 0           | 0           |
| <i>Flavobacteria</i>               | 0            | 0.02         | 0          | 0.42        | 0           |
| <i>Gammaproteobacteria</i>         | 7.13         | 14.61        | 4.03       | 9.31        | 0.32        |
| <i>Gemmatimonadetes</i>            | 2.61         | 0.8          | 4.64       | 9.6         | 8.02        |
| <i>Holophagae</i>                  | 1.27         | 2.58         | 3.47       | 0.08        | 0.17        |
| <i>Ktedonobacteria</i>             | 0.02         | 0            | 0.09       | 0           | 0           |
| <i>Nitriliruptoria</i>             | 0            | 0            | 1.41       | 44.16       | 45.17       |
| <i>Nitrospira</i>                  | 1.76         | 0.02         | 0.42       | 0.46        | 0.44        |
| <i>No_Rank</i>                     | 7.03         | 4            | 5.39       | 0.86        | 1.92        |
| <i>Opitutae</i>                    | 0.1          | 0.9          | 0.28       | 0.08        | 0           |
| <i>Phycisphaerae</i>               | 1.34         | 0.76         | 1.22       | 0.4         | 0.46        |
| <i>Planctomycetacia</i>            | 6.42         | 5.54         | 2.25       | 1.64        | 1.22        |
| <i>Rubrobacteria</i>               | 0.12         | 0.09         | 0.28       | 0           | 0           |
| <i>Spartobacteria</i>              | 0.12         | 0.61         | 0.19       | 0.02        | 0           |
| <i>Sphaerobacteridae{subclass}</i> | 0.02         | 0.02         | 0.05       | 0.5         | 1.82        |
| <i>Sphingobacteriia</i>            | 0.15         | 0.52         | 1.88       | 0.17        | 0.01        |
| <i>TakashiAC-B11</i>               | 0.12         | 0            | 0.09       | 0.17        | 0.32        |
| <i>Thermoleophilia</i>             | 4.69         | 4.81         | 6.43       | 1.05        | 8.4         |
| <i>Thermomicrobia</i>              | 0.1          | 0.29         | 0.75       | 0.11        | 0.7         |
| <i>Thermotogae</i>                 | 0.07         | 0.12         | 0          | 0           | 0           |
| <i>Verrucomicrobiae</i>            | 12.06        | 8.71         | 6.14       | 0.02        | 0           |

**Table S3.** Relative abundances of bacterial order in the studied soils. Values represent percentages of all sequences assigned to the bacteria for soils. The description of sample name is shown in Table 1.

| <b>Order</b>                                    | <b>JBT60</b> | <b>JBT70</b> | <b>JBT1</b> | <b>JBT2</b> | <b>SYT</b> |
|-------------------------------------------------|--------------|--------------|-------------|-------------|------------|
| <i>Acidimicrobiales</i>                         | 12.06        | 8.71         | 2.71        | 3.76        | 6.14       |
| <i>Acidithiobacillales</i>                      | 0.81         | 8.53         | 0.00        | 0.00        | 0.00       |
| <i>Acidobacteria_Order_Incertae_Sedis</i>       | 0.59         | 3.31         | 0.00        | 0.00        | 1.88       |
| <i>Acidobacteriales</i>                         | 0.63         | 0.00         | 0.00        | 0.00        | 0.09       |
| <i>Alteromonadales</i>                          | 0.00         | 0.99         | 0.02        | 0.00        | 0.00       |
| <i>Anaerolineales</i>                           | 0.44         | 3.72         | 0.04        | 0.00        | 2.16       |
| <i>Armatimonadales</i>                          | 0.00         | 0.05         | 0.02        | 0.00        | 0.09       |
| <i>Bacillales</i>                               | 0.17         | 0.09         | 3.66        | 0.09        | 0.23       |
| <i>Bacteroidales</i>                            | 0.00         | 0.36         | 0.06        | 0.00        | 0.00       |
| <i>Bdellovibrionales</i>                        | 0.17         | 0.00         | 0.00        | 0.00        | 0.00       |
| <i>Burkholderiales</i>                          | 0.34         | 2.70         | 0.17        | 0.02        | 2.63       |
| <i>Caldilineales</i>                            | 0.05         | 0.45         | 0.04        | 0.00        | 0.42       |
| <i>Caulobacterales</i>                          | 0.39         | 2.44         | 0.02        | 0.02        | 0.75       |
| <i>Chlorobiales</i>                             | 0.12         | 0.03         | 0.00        | 0.00        | 0.23       |
| <i>Chloroflexales</i>                           | 0.10         | 0.09         | 0.00        | 0.00        | 0.19       |
| <i>Chromatiales</i>                             | 0.00         | 0.00         | 0.00        | 0.00        | 0.05       |
| <i>Chthoniobacterales</i>                       | 0.12         | 0.61         | 0.02        | 0.00        | 0.19       |
| <i>Chthonomonadales</i>                         | 0.00         | 0.09         | 0.00        | 0.00        | 0.00       |
| <i>Clostridiales</i>                            | 0.05         | 0.07         | 0.04        | 0.00        | 0.09       |
| <i>Coriobacteriales</i>                         | 0.02         | 0.02         | 0.00        | 0.00        | 0.00       |
| <i>Corynebacteriales</i>                        | 0.34         | 4.00         | 0.71        | 0.06        | 3.56       |
| <i>Cytophagales</i>                             | 0.37         | 1.02         | 4.01        | 0.13        | 1.41       |
| <i>Deinococcales</i>                            | 0.00         | 0.00         | 0.17        | 0.37        | 0.00       |
| <i>Desulfobacterales</i>                        | 0.00         | 0.50         | 0.00        | 0.00        | 0.14       |
| <i>Desulfurellales</i>                          | 0.68         | 0.00         | 0.00        | 0.00        | 0.05       |
| <i>Desulfuromonadales</i>                       | 0.02         | 0.23         | 0.00        | 0.01        | 0.14       |
| <i>Enterobacteriales</i>                        | 0.00         | 0.05         | 0.00        | 0.00        | 0.05       |
| <i>Euzebyales</i>                               | 0.00         | 0.00         | 4.66        | 12.26       | 0.61       |
| <i>Fibrobacterales</i>                          | 0.10         | 0.02         | 0.00        | 0.00        | 0.00       |
| <i>Flavobacteriales</i>                         | 0.00         | 0.02         | 0.42        | 0.00        | 0.00       |
| <i>Frankiales</i>                               | 0.17         | 0.33         | 0.27        | 0.31        | 2.16       |
| <i>Gaiellales</i>                               | 1.07         | 0.19         | 0.23        | 0.37        | 0.75       |
| <i>Gammaproteobacteria_Order_Incertae_Sedis</i> | 0.00         | 0.00         | 0.17        | 0.01        | 0.00       |
| <i>Gemmatimonadales</i>                         | 2.12         | 0.43         | 0.29        | 0.09        | 2.53       |
| <i>Glycomycetales</i>                           | 0.00         | 0.00         | 0.02        | 0.02        | 0.00       |
| <i>Hydrogenophilales</i>                        | 0.00         | 0.40         | 0.00        | 0.00        | 0.00       |
| <i>Ignavibacteriales</i>                        | 0.00         | 0.02         | 0.00        | 0.00        | 0.05       |
| <i>Kineosporiales</i>                           | 0.02         | 0.00         | 0.02        | 0.00        | 0.19       |
| <i>Legionellales</i>                            | 0.76         | 0.24         | 0.13        | 0.00        | 0.14       |
| <i>Micrococcales</i>                            | 0.46         | 9.54         | 2.48        | 0.43        | 3.33       |
| <i>Micromonosporales</i>                        | 0.29         | 0.19         | 0.29        | 0.07        | 0.28       |
| <i>Myxococcales</i>                             | 1.93         | 1.82         | 0.04        | 0.01        | 1.22       |

Table S3. Cont.

| Order                       | JBT60 | JBT70 | JBT1  | JBT2  | SYT  |
|-----------------------------|-------|-------|-------|-------|------|
| <i>Nitriliruptorales</i>    | 0.00  | 0.00  | 39.45 | 32.64 | 0.80 |
| <i>Nitrosomonadales</i>     | 1.00  | 0.64  | 0.00  | 0.00  | 0.42 |
| <i>Nitrospirales</i>        | 1.76  | 0.02  | 0.46  | 0.44  | 0.42 |
| <i>Oceanospirillales</i>    | 0.00  | 0.00  | 5.27  | 0.18  | 0.00 |
| <i>Opitutales</i>           | 0.10  | 0.88  | 0.04  | 0.00  | 0.28 |
| <i>Phycisphaerales</i>      | 0.27  | 0.17  | 0.23  | 0.32  | 0.00 |
| <i>Planctomycetales</i>     | 6.42  | 5.54  | 1.64  | 1.22  | 2.25 |
| <i>Propionibacteriales</i>  | 0.66  | 1.61  | 1.68  | 2.04  | 7.04 |
| <i>Pseudomonadales</i>      | 2.00  | 0.09  | 3.36  | 0.01  | 2.30 |
| <i>Pseudonocardiales</i>    | 0.59  | 0.45  | 0.04  | 4.76  | 0.56 |
| <i>Puniceicoccales</i>      | 0.00  | 0.02  | 0.02  | 0.00  | 0.00 |
| <i>Rhizobiales</i>          | 7.13  | 5.5   | 3.74  | 1.22  | 3.00 |
| <i>Rhodobacterales</i>      | 0.10  | 0.36  | 0.59  | 0.09  | 0.56 |
| <i>Rhodocyclales</i>        | 0.00  | 0.07  | 0.00  | 0.00  | 0.33 |
| <i>Rhodospirillales</i>     | 6.22  | 4.22  | 0.82  | 0.87  | 1.41 |
| <i>Rickettsiales</i>        | 0.07  | 0.05  | 0.04  | 0.05  | 0.19 |
| <i>Rubrobacterales</i>      | 0.12  | 0.09  | 0.00  | 0.00  | 0.28 |
| <i>Solirubrobacterales</i>  | 3.61  | 4.62  | 0.80  | 8.02  | 5.63 |
| <i>Sphaerobacterales</i>    | 0.02  | 0.02  | 0.50  | 1.82  | 0.05 |
| <i>Sphingobacteriales</i>   | 0.15  | 0.52  | 0.17  | 0.01  | 1.88 |
| <i>Sphingomonadales</i>     | 2.68  | 1.52  | 0.78  | 0.42  | 7.27 |
| <i>Streptomycetales</i>     | 0.24  | 0.17  | 0.15  | 0.07  | 0.52 |
| <i>Streptosporangiales</i>  | 0.02  | 0.00  | 0.08  | 0.77  | 0.00 |
| <i>Syntrophobacteriales</i> | 0.07  | 0.05  | 0.00  | 0.00  | 0.00 |
| <i>Verrucomicrobiales</i>   | 0.07  | 0.12  | 0.02  | 0.00  | 0.00 |
| <i>Xanthomonadales</i>      | 3.37  | 2.73  | 0.11  | 0.06  | 1.27 |

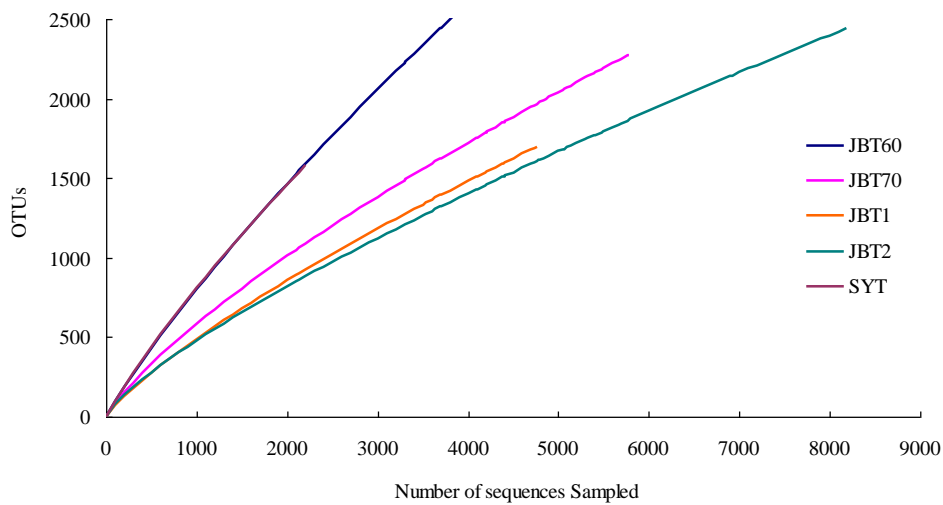

**Figure S1.** Rarefaction curves based on 16S rRNA sequences among the different samples. The curves were generated for 97% levels of OTUs. The abbreviation of samples is shown in Table 1.

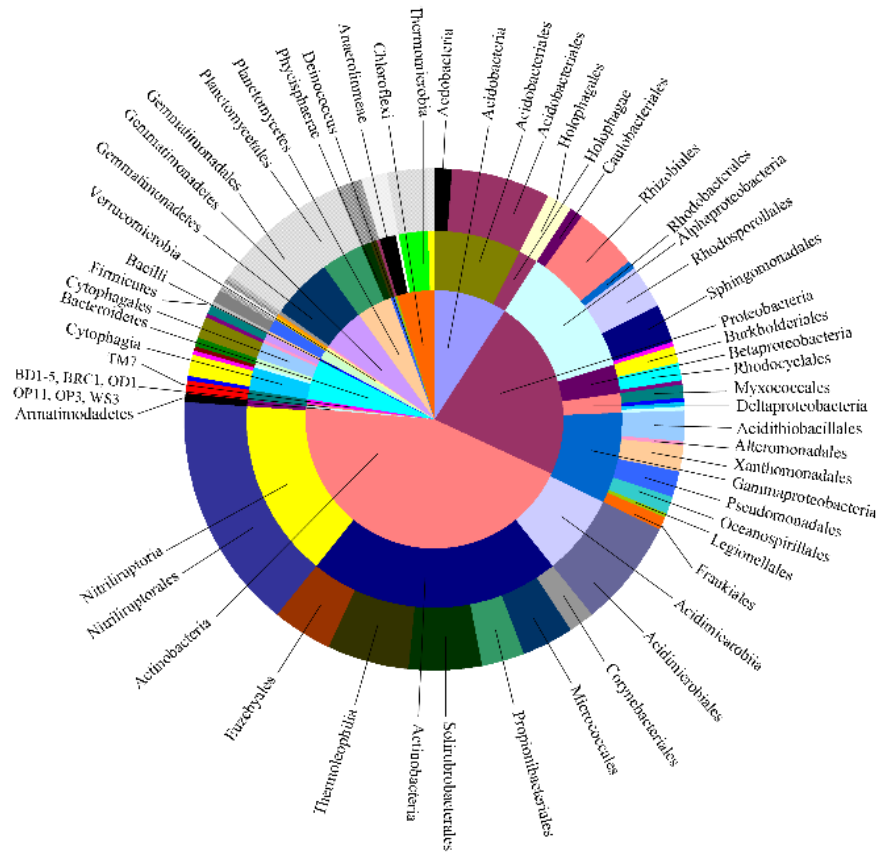

**Figure S2.** Bacterial diversity richness and phylogenetic distribution on phylum (**Inner Circle**), class (**Middle Circle**), and order level (**Outer Circle**).

© 2015 by the authors; licensee MDPI, Basel, Switzerland. This article is an open access article distributed under the terms and conditions of the Creative Commons Attribution license (<http://creativecommons.org/licenses/by/4.0/>).
